# Supplementary material for: Mutant B2M‐HLA‐E and B2M‐HLA‐G fusion proteins protects universal chimeric antigen receptor‐modified T cells from allogeneic NK cell‐mediated lysis
Source: PubMed Central journal article supplement (PMC9292285; doi:10.1002/eji.202049107), 2021-08-19
Supplement: EJI-51-2513-s001.pdf [file EJI-51-2513-s001.pdf]

**Mutant B2M-HLA-E and B2M-HLA-G fusion proteins protects universal chimeric antigen receptor-modified T cells from allogeneic NK cell-mediated lysis**

**Supplemental Figures:**

Supplemental Figure 1

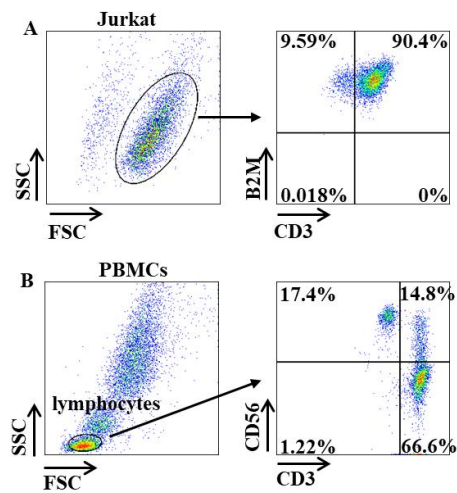

Supplemental Figure 1 A Representative gating strategy of TCR and B2M expression in Jurkat cells. B Representative gating strategy of CD3 and CD56 expression in PBMCs. The numbers represent the percentages of positive cells. SSC, side scatter; FSC, forward scatter.

Supplemental Figure 2

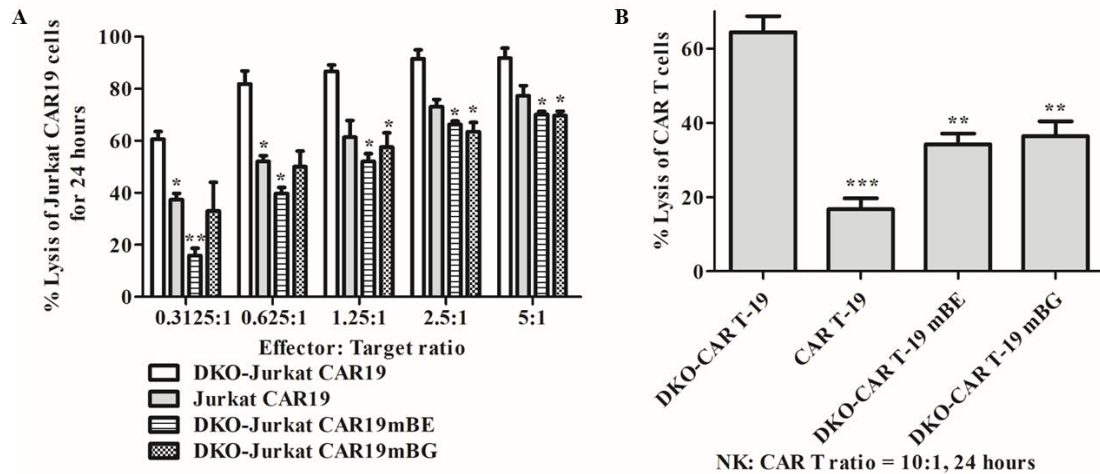

Supplemental Figure 2 **A** NK cell cytotoxicity on DKO gene-edited Jurkat CAR19 cells after cocultured at effector-to-target ratios of 5:1, 2.5:1, 1.25:1, 0.625:1 and 0.3125:1 for 24 hours (n = 3 different donors in three independent experiments. \*, P<0.05, \*\*, P<0.01, versus DKO-Jurkat CAR19; t test, GraphPad Prism version 5). **B** Allogeneic primary NK cell cytotoxicity on DKO gene-edited CAR T-19 cells after cocultured at a NK-to-CAR T cell ratio of 10:1 for 24 hours (n = 4 different donors in four independent experiments. \*\*, P<0.01, \*\*\*, P<0.001, versus DKO-CAR T-19; t test, GraphPad Prism version 5).

Supplemental Figure 3

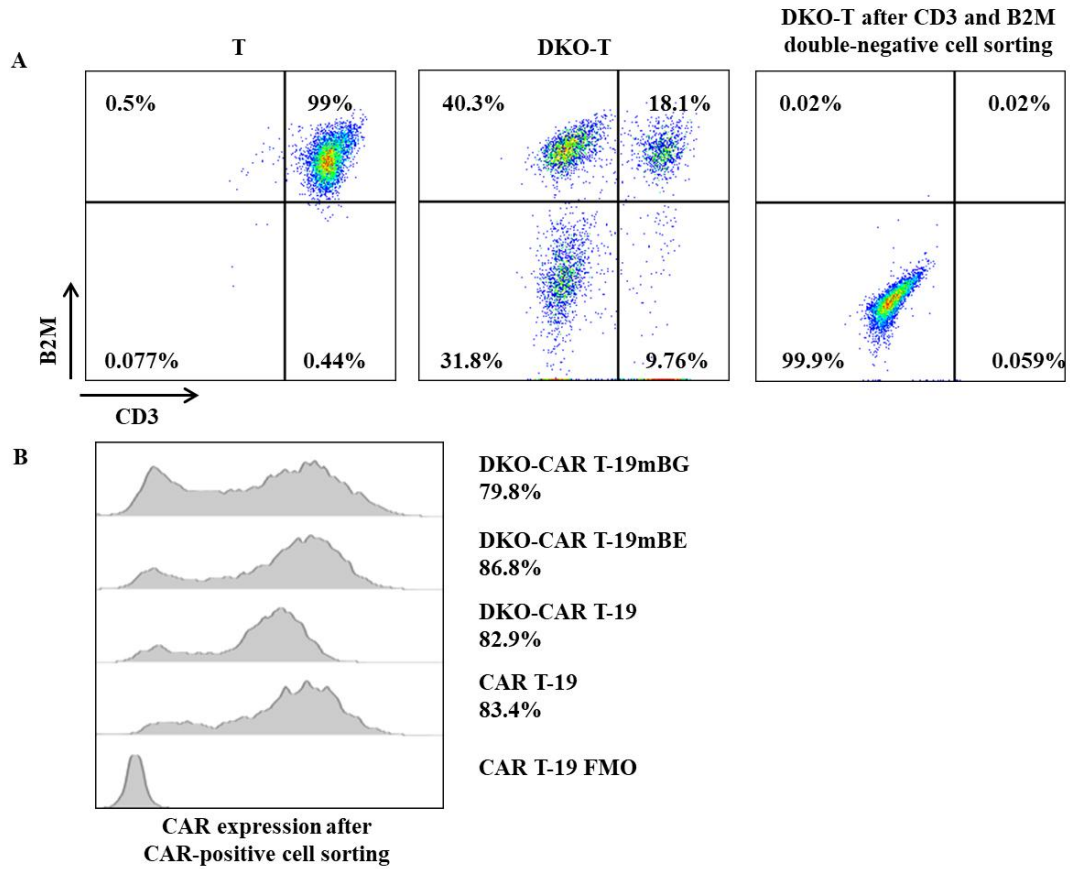

Supplemental Figure 3 Generation of TCR and B2M double-negative knockout (DKO) gene-edited CAR T-19 cells. **A** Representative TCR and B2M expression in T cells before and after electroporation and in DKO-T cells after TCR and B2M double-negative cell sorting. The numbers represent the percentages in each gate. **B** Representative CAR expression in gene-edited CAR T-19 cells after CAR-positive cell sorting. Gates were established by using FMO controls (biotin-SP-AffiniPure F(ab)<sup>2</sup> fragment). The numbers represent the percentages of positive cells.

Supplemental Figure 4

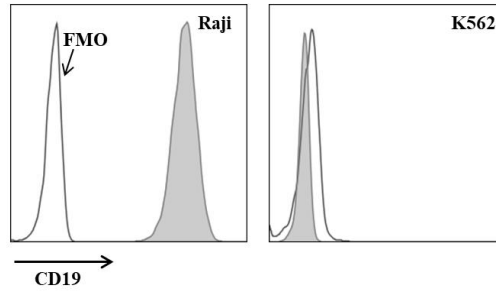

Supplemental Figure 4 CD19 expression in Raji (human Burkitt's lymphoma cell line) and K562 (human chronic myelogenous leukemia cell line) cells as determined by flow cytometry. These tumor cells were incubated with an anti-human CD19 antibody (BD), and gates were established by using FMO controls (CD19).

Supplemental Figure 5

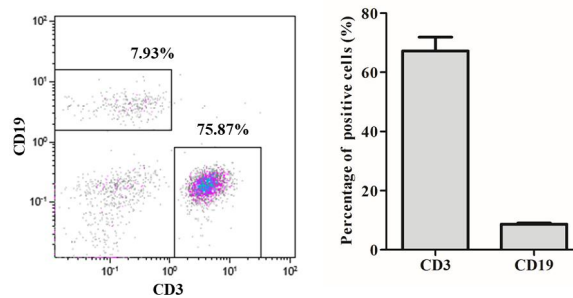

Supplemental Figure 5 CD3 and CD19 expression in PBMCs obtained from volunteer donors. Representative CD3 and CD19 expression in PBMCs is shown in the left panel. The numbers represent the percentages of positive cells. The statistical analysis of CD3 and CD19 expression in PBMCs is shown on the right. The bars in the right panel show the mean  $\pm$  SDs from 3 donors in three independent experiments.

Supplemental Table 1 Information of flow antibodies

| Company                   | Antigen                                                                                 | Fluorescence    | Category number |
|---------------------------|-----------------------------------------------------------------------------------------|-----------------|-----------------|
| BD                        | CD3                                                                                     | FITC            | 555332          |
|                           | CD3                                                                                     | PerCP           | 347344          |
|                           | CD3/4/8                                                                                 | PerCP/FITC/PE   | 79978           |
|                           | CD19                                                                                    | PE              | 340364          |
|                           | CD45RO                                                                                  | Alexa Fluor 700 | 561136          |
|                           | CD56                                                                                    | PE              | 561903          |
|                           | CD62L                                                                                   | APC             | 559772          |
|                           | CD107a                                                                                  | APC             | 560664          |
|                           | B2M                                                                                     | PE              | 551337          |
|                           | streptavidin                                                                            | PE              | 554061          |
| Jackson<br>ImmunoResearch | biotin-SP-AffiniPure<br>F(ab)'2<br>fragment-specific<br>goat anti-mouse IgG<br>antibody | Not application | 115065072       |
| Biolegend                 | HLA-ABC                                                                                 | FITC            | 311404          |
|                           | HLA-C                                                                                   | Not application | 373302          |
|                           | HLA-E                                                                                   | APC             | 342606          |
|                           | HLA-G                                                                                   | PECY7           | 335912          |
|                           | NKG2A                                                                                   | APC             | 375107          |
|                           | KIR2DL4                                                                                 | APC             | 247007          |
|                           | LILRB1                                                                                  | APC             | 333719          |
